# Supplementary material
Source: MDPI journal article supplement (https://www.mdpi.com/1999-4907/14/10/1972)
Supplement: s1 [file s1]

# Supplementary Materials

**Table S1.** The evaluation and generalized value of candidate trees to select *T. amurensis* plus tree.

| Population | ID       | Height | DBH  | $HD_{35y}^2$ | STF | AD  | AE  | $GVI_{p,i}$ | $GVI_{t,i}$ | $GVI_{w,i}$ |
|------------|----------|--------|------|--------------|-----|-----|-----|-------------|-------------|-------------|
| IY I       | IY I-01  | 11     | 28.7 | 0.0207       | 4   | 4   | 5   | -0.7805     | -0.3656     | -0.6560     |
|            | IY I-02  | 17     | 42.3 | 0.0455       | 4.5 | 4.5 | 5   | 0.4367      | 0.5585      | 0.4733      |
|            | IY I-03  | 14     | 20.4 | 0.0205       | 5   | 4.5 | 5   | 0.2439      | 0.4318      | 0.3003      |
|            | IY I-04  | 16     | 20   | 0.0123       | 5   | 5   | 4.5 | 0.1313      | 0.3054      | 0.1835      |
|            | IY I-05  | 15     | 22.4 | 0.0232       | 4   | 4.5 | 4.5 | -0.6360     | -0.3023     | -0.5359     |
|            | IY I-06  | 18     | 23.8 | 0.0111       | 4   | 4.5 | 3   | -1.3127     | -0.9617     | -1.2074     |
|            | IY I-07  | 20     | 33.3 | 0.0253       | 5   | 4.7 | 5   | 0.4440      | 0.5835      | 0.4858      |
|            | IY I-08  | 20     | 41.4 | 0.0362       | 5   | 5   | 4.7 | 0.7569      | 0.7885      | 0.7664      |
|            | IY I-09  | 16     | 24.9 | 0.0489       | 5   | 4.5 | 4.5 | 0.7981      | 0.7875      | 0.7949      |
|            | IY I-10  | 17     | 23.7 | 0.0350       | 4   | 4   | 4.5 | -0.5642     | -0.2593     | -0.4727     |
|            | IY I-11  | 17     | 22   | 0.0225       | 5   | 5   | 5   | 0.5048      | 0.6344      | 0.5437      |
|            | Average  | 16.5   | 27.5 | 0.0274       | 4.6 | 4.6 | 4.6 |             |             |             |
| IY II      | IY II-1  | 14     | 20   | 0.0069       | 4   | 4.3 | 4   | -0.9690     | -0.8063     | -0.9202     |
|            | IY II-2  | 19     | 30.9 | 0.0223       | 5   | 4.7 | 5   | 0.6325      | 0.5301      | 0.6018      |
|            | IY II-3  | 18     | 31   | 0.0313       | 5   | 4.5 | 5   | 0.8895      | 0.6242      | 0.8099      |
|            | IY II-4  | 16     | 20.5 | 0.0131       | 3   | 4   | 4   | -1.3925     | -1.4303     | -1.4038     |
|            | IY II-5  | 19     | 38.2 | 0.0267       | 5   | 5   | 4.5 | 0.7699      | 0.5614      | 0.7073      |
|            | IY II-6  | 18     | 24.3 | 0.0141       | 5   | 4.3 | 5   | 0.1521      | 0.2514      | 0.1819      |
|            | IY II-7  | 21     | 27.4 | 0.0162       | 4   | 4.5 | 4   | -0.5318     | -0.5744     | -0.5445     |
|            | IY II-8  | 21     | 27.1 | 0.0160       | 5   | 5   | 4.7 | 0.4287      | 0.4304      | 0.4292      |
|            | Average  | 18.3   | 27.4 | 0.0183       | 4.5 | 4.5 | 4.5 |             |             |             |
| IY III     | IY III-1 | 16     | 25.3 | 0.0110       | 4   | 4.5 | 4   | -1.3439     | -0.6664     | -1.1406     |
|            | IY III-2 | 18     | 39.8 | 0.0350       | 5   | 4.7 | 5   | 0.7540      | 0.7566      | 0.7548      |
|            | IY III-3 | 18     | 30   | 0.0348       | 4.5 | 5   | 5   | 0.5138      | 0.5365      | 0.5206      |
|            | IY III-4 | 20     | 25.5 | 0.0202       | 5   | 5   | 4.8 | 0.3755      | 0.5349      | 0.4233      |
|            | IY III-5 | 18     | 29.3 | 0.0183       | 5   | 4.5 | 4   | -0.2543     | 0.0974      | -0.1488     |
|            | IY III-6 | 20     | 27.5 | 0.0250       | 4   | 5   | 4   | -0.5567     | -0.2504     | -0.4648     |
|            | IY III-7 | 19     | 30.3 | 0.0282       | 5   | 5   | 4.5 | 0.5508      | 0.5878      | 0.5619      |
|            | Average  | 18.4   | 29.7 | 0.0247       | 4.6 | 4.8 | 4.5 |             |             |             |
| IJ         | IJ-01    | 18     | 30.8 | 0.0200       | 4   | 5   | 4   | -0.6320     | -0.3403     | -0.5444     |
|            | IJ-02    | 17     | 24.8 | 0.0122       | 4   | 3   | 4   | -1.1372     | -1.1452     | -1.1396     |
|            | IJ-03    | 20     | 30.9 | 0.0157       | 5   | 5   | 4   | 0.1965      | 0.2176      | 0.2028      |
|            | IJ-04    | 21     | 40.7 | 0.0293       | 5   | 5   | 5   | 0.5822      | 0.7560      | 0.6343      |
|            | IJ-05    | 19     | 28.8 | 0.0128       | 4.5 | 5   | 4   | -0.2676     | -0.1512     | -0.2327     |
|            | IJ-06    | 18     | 39.8 | 0.0240       | 4.5 | 4   | 3   | -0.6228     | -0.5814     | -0.6104     |
|            | IJ-07    | 21     | 43.5 | 0.0550       | 5   | 5   | 4.7 | 0.7588      | 1.1217      | 0.8677      |
|            | IJ-08    | 18     | 33.2 | 0.0232       | 4   | 5   | 4   | -0.6001     | -0.2829     | -0.5050     |
|            | IJ-09    | 21     | 41.5 | 0.0520       | 5   | 4   | 5   | 0.5907      | 0.8245      | 0.6609      |
|            | IJ-10    | 23     | 45.2 | 0.1110       | 5   | 5   | 4   | 1.1340      | 1.9087      | 1.3664      |
|            | Average  | 19.6   | 35.9 | 0.0355       | 4.6 | 4.6 | 4.2 |             |             |             |
| IB         | IB-01    | 16     | 29   | 0.0133       | 4.5 | 5   | 5   | -0.0451     | 0.1541      | 0.0147      |
|            | IB-02    | 17     | 22   | 0.0134       | 4.5 | 4   | 4   | -0.2771     | -0.4739     | -0.3361     |
|            | IB-03    | 17     | 20.3 | 0.0136       | 5   | 4   | 4.5 | -0.0724     | -0.0048     | -0.0521     |
|            | IB-04    | 17     | 25.9 | 0.0204       | 5   | 5   | 4.7 | 0.1340      | 0.5081      | 0.2462      |
|            | IB-05    | 20     | 41.6 | 0.0538       | 5   | 5   | 4.5 | 0.4436      | 1.0420      | 0.6231      |
|            | IB-06    | 16     | 24.4 | 0.0205       | 4   | 4.5 | 4   | -0.2924     | -0.4982     | -0.3541     |
|            | IB-07    | 18     | 33.8 | 0.0203       | 5   | 4.5 | 5   | 0.1107      | 0.4285      | 0.2060      |
|            | Average  | 17.3   | 28.1 | 0.0222       | 4.7 | 4.6 | 4.5 |             |             |             |
| HM         | HM-01    | 12     | 20   | 0.0052       | 4   | 4.5 | 5   | -0.5624     | -0.4738     | -0.5358     |
|            | HM-02    | 14     | 23.5 | 0.0039       | 5   | 4.5 | 5   | 0.2163      | 0.1377      | 0.1927      |

|        |           |      |      |        |     |     |     |         |         |         |
|--------|-----------|------|------|--------|-----|-----|-----|---------|---------|---------|
|        | HM-03     | 15   | 24.5 | 0.0111 | 4   | 4.5 | 4.5 | -0.3449 | -0.5172 | -0.3966 |
|        | HM-04     | 17   | 33   | 0.0097 | 4.5 | 5   | 5   | 0.3667  | 0.0901  | 0.2837  |
|        | HM-05     | 16   | 28.8 | 0.0177 | 4   | 5   | 5   | 0.5183  | -0.0845 | 0.3374  |
|        | HM-06     | 13   | 28   | 0.0116 | 4.5 | 4   | 5   | 0.1800  | -0.2098 | 0.0630  |
|        | HM-07     | 14   | 33.4 | 0.0126 | 5   | 4.5 | 5   | 0.8526  | 0.2920  | 0.6844  |
|        | HM-08     | 13   | 30.2 | 0.0063 | 4   | 3.5 | 4   | -1.2318 | -1.0830 | -1.1872 |
|        | HM-09     | 15   | 23.5 | 0.0075 | 4   | 4   | 4.5 | -0.7657 | -0.7465 | -0.7599 |
|        | HM-10     | 17   | 24   | 0.0116 | 5   | 4.5 | 5   | 0.7808  | 0.2746  | 0.6289  |
|        | Average   | 14.6 | 26.9 | 0.0097 | 4.4 | 4.4 | 4.8 |         |         |         |
| HC     | HC-01     | 20   | 36.6 | 0.0230 | 5   | 5   | 4.5 | 0.5793  | 0.4959  | 0.5543  |
|        | HC-02     | 17   | 31.9 | 0.0240 | 5   | 4   | 5   | 0.3984  | 0.3279  | 0.3773  |
|        | HC-03     | 15   | 22.8 | 0.0132 | 4.5 | 4   | 4   | -0.6202 | -0.4780 | -0.5776 |
|        | HC-04     | 19   | 28.1 | 0.0200 | 4   | 5   | 4.5 | -0.4050 | -0.1917 | -0.3410 |
|        | HC-05     | 15   | 22.5 | 0.0109 | 4   | 5   | 4.5 | -0.6417 | -0.3527 | -0.5550 |
|        | HC-06     | 15   | 22.9 | 0.0100 | 4   | 4   | 4.5 | -1.0153 | -0.7038 | -0.9219 |
|        | HC-07     | 18   | 34   | 0.0294 | 4   | 4.5 | 3   | -0.7568 | -0.6356 | -0.7205 |
|        | HC-08     | 16   | 22.5 | 0.0212 | 5   | 4.5 | 5   | 0.4985  | 0.4445  | 0.4823  |
|        | HC-09     | 15   | 20.9 | 0.0111 | 4.5 | 4   | 4.5 | -0.5338 | -0.3672 | -0.4838 |
|        | HC-10     | 18   | 34.4 | 0.0210 | 5   | 4   | 5   | 0.3198  | 0.2744  | 0.3062  |
|        | HC-11     | 16   | 30.6 | 0.0577 | 5   | 4.5 | 5   | 1.4504  | 1.0919  | 1.3428  |
|        | HC-12     | 17   | 25.6 | 0.0181 | 5   | 5   | 4.7 | 0.5081  | 0.4684  | 0.4962  |
|        | HC-13     | 17   | 24.7 | 0.0175 | 5   | 4   | 5   | 0.2283  | 0.2122  | 0.2235  |
|        | HC-14     | 16   | 22.5 | 0.0166 | 4.5 | 4   | 4.5 | -0.3886 | -0.2685 | -0.3526 |
|        | HC-15     | 17   | 24.8 | 0.0174 | 5   | 4.5 | 5   | 0.4003  | 0.3777  | 0.3935  |
|        | Average   | 16.7 | 27   | 0.0207 | 4.6 | 4.4 | 4.6 |         |         |         |
| PD I   | PD I-01   | 16   | 41   | 0.0102 | 3   | 5   | 5   | -0.5142 | -0.8510 | -0.6153 |
|        | PD I-02   | 18   | 41.3 | 0.0288 | 3   | 5   | 5   | -0.0407 | -0.5205 | -0.1846 |
|        | PD I-03   | 16   | 46.5 | 0.0332 | 3   | 5   | 5   | 0.0698  | -0.4435 | -0.0842 |
|        | PD I-04   | 17   | 25.2 | 0.0088 | 4.5 | 5   | 5   | 0.0681  | 0.0753  | 0.0703  |
|        | PD I-05   | 18   | 30   | 0.0160 | 5   | 5   | 4   | 0.2435  | 0.2227  | 0.2372  |
|        | PD I-06   | 16   | 34.8 | 0.0130 | 3.5 | 5   | 4   | -0.4509 | -0.7818 | -0.5502 |
|        | PD I-07   | 21   | 41   | 0.0095 | 3   | 5   | 4   | -0.7434 | -1.1592 | -0.8681 |
|        | PD I-08   | 15   | 60.5 | 0.0194 | 5   | 5   | 3   | 0.1177  | -0.0133 | 0.0784  |
|        | PD I-09   | 13   | 23.5 | 0.0310 | 5   | 4   | 5   | 0.4807  | 0.4509  | 0.4718  |
|        | PD I-10   | 18   | 28   | 0.0423 | 5   | 4   | 5   | 0.7695  | 0.6525  | 0.7344  |
|        | Average   | 16.8 | 37.2 | 0.0212 | 4   | 4.8 | 4.5 |         |         |         |
| PD II  | PD II-8   | 12   | 30   | 0.0197 | 4.5 | 4.5 | 5   | 0.0202  | 0.1013  | 0.0445  |
|        | PD II-9   | 14   | 25.4 | 0.0084 | 4   | 4.5 | 5   | -1.0911 | -0.4157 | -0.8885 |
|        | PD II-10  | 17   | 28.7 | 0.0107 | 5   | 5   | 4.5 | 0.1412  | 0.2764  | 0.1818  |
|        | PD II-11  | 17   | 26   | 0.0133 | 4.5 | 5   | 5   | -0.1180 | 0.1548  | -0.0362 |
|        | PD II-12  | 19   | 29.8 | 0.0176 | 5   | 5   | 4   | 0.2982  | 0.2510  | 0.2840  |
|        | PD II-13  | 22   | 31.6 | 0.0205 | 5   | 5   | 5   | 0.7962  | 0.5994  | 0.7371  |
|        | PD II-14  | 21   | 39.4 | 0.0275 | 5   | 4   | 5   | 0.7912  | 0.3895  | 0.6707  |
|        | PD II-15  | 17   | 25.3 | 0.0153 | 4.5 | 4   | 4   | -0.7198 | -0.4399 | -0.6358 |
|        | PD II-16  | 21   | 26.3 | 0.0123 | 5   | 4   | 5   | 0.0536  | 0.1190  | 0.0732  |
|        | PD II-17  | 18   | 21.5 | 0.0073 | 5   | 4.5 | 4.5 | -0.1929 | 0.0498  | -0.1201 |
|        | Average   | 17.8 | 28.4 | 0.0153 | 4.8 | 4.6 | 4.7 |         |         |         |
| PD III | PD III-01 | 16   | 19.8 | 0.0179 | 5   | 4   | 4.5 | 0.2491  | 0.0715  | 0.1958  |
|        | PD III-02 | 11   | 18.6 | 0.0128 | 4   | 4   | 5   | -0.5869 | -0.5046 | -0.5623 |
|        | PD III-03 | 14   | 22   | 0.0141 | 5   | 4.5 | 4.5 | 0.2560  | 0.1704  | 0.2303  |
|        | PD III-04 | 13   | 24   | 0.0165 | 5   | 5   | 4.5 | 0.5231  | 0.3800  | 0.4802  |
|        | PD III-05 | 16   | 28.3 | 0.0316 | 5   | 5   | 4.5 | 1.1538  | 0.6485  | 1.0022  |
|        | PD III-06 | 9    | 17.8 | 0.0119 | 4.5 | 4.5 | 4   | -0.4732 | -0.3336 | -0.4313 |
|        | PD III-07 | 8    | 22.4 | 0.0104 | 4   | 4   | 4   | -1.1227 | -0.8439 | -1.0390 |
|        | Average   | 12.4 | 21.8 | 0.0165 | 4.6 | 4.4 | 4.4 |         |         |         |
| PY I   | PY I-01   | 15   | 24.3 | 0.0125 | 4.5 | 3   | 4.5 | -0.8089 | -0.6761 | -0.7691 |
|        | PY I-02   | 17   | 38.9 | 0.0132 | 3.5 | 4   | 4.5 | -1.4062 | -0.9629 | -1.2732 |

|       |          |      |      |        |     |     |     |         |         |         |
|-------|----------|------|------|--------|-----|-----|-----|---------|---------|---------|
|       | PY I-03  | 16   | 25.2 | 0.0203 | 5   | 4.5 | 5   | 0.9268  | 0.4277  | 0.7771  |
|       | PY I-04  | 17   | 32.5 | 0.0205 | 5   | 4.7 | 5   | 0.9985  | 0.4982  | 0.8484  |
|       | PY I-05  | 18   | 34.5 | 0.0160 | 4.7 | 4.5 | 5   | 0.3013  | 0.1619  | 0.2595  |
|       | PY I-06  | 18   | 37.3 | 0.0131 | 5   | 5   | 4.8 | 0.3918  | 0.4083  | 0.3967  |
|       | PY I-07  | 19   | 33.8 | 0.0190 | 5   | 4.5 | 5   | 0.8279  | 0.4061  | 0.7013  |
|       | PY I-08  | 16   | 30.3 | 0.0148 | 4.5 | 5   | 4.5 | -0.0741 | 0.0325  | -0.0421 |
|       | PY I-09  | 16   | 31.5 | 0.0143 | 5   | 4.7 | 5   | 0.4977  | 0.3886  | 0.4649  |
|       | PY I-10  | 14   | 31.5 | 0.0103 | 4.5 | 4   | 4.5 | -0.7113 | -0.3808 | -0.6121 |
|       | PY I-11  | 16   | 27.5 | 0.0104 | 4.7 | 4.5 | 5   | -0.1507 | 0.0630  | -0.0866 |
|       | PY I-12  | 15   | 19.5 | 0.0102 | 4.5 | 4.7 | 4   | -0.7558 | -0.2970 | -0.6182 |
|       | Average  | 16.4 | 30.6 | 0.0145 | 4.7 | 4.4 | 4.7 |         |         |         |
| PY II | PY II-01 | 9.5  | 26   | 0.0032 | 4.5 | 4.5 | 4   | -0.9876 | -0.4888 | -0.8379 |
|       | PY II-02 | 13   | 37.9 | 0.0093 | 4   | 4   | 4.5 | -1.0820 | -0.7162 | -0.9723 |
|       | PY II-03 | 12   | 26   | 0.0094 | 4.7 | 5   | 5   | 0.2821  | 0.2120  | 0.2611  |
|       | PY II-04 | 14   | 33.8 | 0.0155 | 4   | 5   | 5   | -0.0467 | -0.1231 | -0.0697 |
|       | PY II-05 | 13   | 24.6 | 0.0073 | 5   | 4.5 | 5   | 0.2556  | 0.1976  | 0.2382  |
|       | PY II-06 | 15   | 31.1 | 0.0098 | 4.7 | 4.5 | 5   | 0.1090  | 0.0524  | 0.0920  |
|       | PY II-07 | 16   | 33.8 | 0.0142 | 5   | 5   | 5   | 0.9073  | 0.4874  | 0.7814  |
|       | PY II-08 | 16   | 26.6 | 0.0094 | 5   | 5   | 4.5 | 0.3669  | 0.2541  | 0.3331  |
|       | PY II-09 | 14   | 26.7 | 0.0050 | 4.7 | 5   | 4.5 | -0.2298 | -0.0135 | -0.1649 |
|       | PY II-10 | 16   | 37   | 0.0183 | 4.5 | 4.5 | 5   | 0.4565  | 0.0767  | 0.3425  |
|       | PY II-11 | 18   | 35.7 | 0.0116 | 4   | 4.5 | 4.5 | -0.7308 | -0.5081 | -0.6640 |
|       | PY II-12 | 17   | 24.9 | 0.0107 | 4.5 | 4   | 5   | -0.2407 | -0.2255 | -0.2361 |
|       | PY II-13 | 18   | 29   | 0.0182 | 5   | 5   | 4.5 | 0.9401  | 0.4100  | 0.7811  |
|       | Average  | 14.7 | 30.2 | 0.0109 | 4.6 | 4.7 | 4.7 |         |         |         |
| GM    | GM-01    | 17   | 21.3 | 0.0138 | 5   | 4.5 | 5   | 0.3979  | 0.3131  | 0.3725  |
|       | GM-02    | 18   | 20.6 | 0.0176 | 4   | 4.5 | 4   | -0.4407 | -0.5495 | -0.4733 |
|       | GM-03    | 15   | 20.5 | 0.0110 | 5   | 4.5 | 4   | -0.1158 | -0.0322 | -0.0907 |
|       | GM-04    | 16   | 19.6 | 0.0110 | 5   | 4.5 | 5   | 0.1552  | 0.2635  | 0.1877  |
|       | GM-05    | 16   | 20.8 | 0.0085 | 5   | 5   | 4   | 0.0014  | 0.0900  | 0.0280  |
|       | Average  | 16.4 | 20.6 | 0.0124 | 4.8 | 4.6 | 4.4 |         |         |         |
| JB    | JB-01    | 13   | 24.1 | 0.0230 | 5   | 5   | 5   | 0.6564  | 0.6442  | 0.6528  |
|       | JB-02    | 14   | 20.7 | 0.0146 | 5   | 4   | 4   | -0.3423 | -0.1352 | -0.2802 |
|       | JB-03    | 16   | 29.8 | 0.0248 | 4.5 | 5   | 5   | 0.5123  | 0.3592  | 0.4664  |
|       | JB-04    | 16   | 30.4 | 0.0241 | 4.7 | 5   | 5   | 0.5676  | 0.4724  | 0.5390  |
|       | JB-05    | 11   | 18.4 | 0.0131 | 3   | 4   | 4   | -1.3855 | -1.4300 | -1.3989 |
|       | Average  | 14   | 24.7 | 0.0199 | 4.4 | 4.6 | 4.6 |         |         |         |
| TS    | TS-01    | 9    | 15.1 | 0.0067 | 4   | 5   | 5   | -0.1020 | -0.2804 | -0.1555 |
|       | TS-02    | 12   | 16.1 | 0.0069 | 4   | 5   | 5   | -0.0837 | -0.2756 | -0.1413 |
|       | TS-03    | 10   | 17.5 | 0.0141 | 3   | 5   | 3   | -0.5080 | -1.3743 | -0.7679 |
|       | TS-04    | 16   | 25.8 | 0.0179 | 4   | 5   | 5   | 0.6629  | -0.0805 | 0.4399  |
|       | TS-05    | 17   | 19   | 0.0096 | 5   | 4   | 5   | 0.1381  | 0.0712  | 0.1181  |
|       | TS-06    | 15   | 19   | 0.0148 | 5   | 5   | 4.7 | 0.9350  | 0.4090  | 0.7772  |
|       | TS-07    | 10   | 17.5 | 0.0068 | 4   | 5   | 5   | -0.0910 | -0.2775 | -0.1469 |
|       | TS-08    | 12   | 20.1 | 0.0127 | 4   | 5   | 4   | 0.1212  | -0.4696 | -0.0560 |
|       | TS-09    | 16   | 20.5 | 0.0148 | 4.7 | 5   | 5   | 0.8262  | 0.3070  | 0.6704  |
|       | TS-10    | 11   | 18.8 | 0.0082 | 3   | 5   | 3   | -0.9091 | -1.4791 | -1.0801 |
|       | TS-11    | 8    | 16.8 | 0.0042 | 3   | 5   | 4   | -0.9924 | -1.2533 | -1.0707 |
|       | Average  | 12.4 | 18.7 | 0.0106 | 4   | 4.9 | 4.4 |         |         |         |
| TH    | TH-01    | 19   | 30.5 | 0.0344 | 5   | 3.7 | 5   | 0.0560  | 0.4113  | 0.1626  |
|       | TH-02    | 21   | 22.1 | 0.0232 | 5   | 4   | 5   | 0.0325  | 0.3133  | 0.1168  |
|       | TH-03    | 26   | 32.4 | 0.0296 | 5   | 5   | 5   | 0.3905  | 0.7605  | 0.5015  |
|       | TH-04    | 26   | 37   | 0.0260 | 5   | 4   | 5   | 0.0601  | 0.3622  | 0.1507  |
|       | TH-05    | 27   | 43.5 | 0.1245 | 5   | 4.7 | 5   | 1.2517  | 2.3447  | 1.5796  |
|       | TH-06    | 28   | 28.2 | 0.0166 | 5   | 4   | 5   | -0.0334 | 0.1963  | 0.0355  |
|       | TH-07    | 28   | 23.6 | 0.0217 | 4   | 5   | 5   | -0.1903 | -0.0141 | -0.1374 |
|       | TH-08    | 16   | 22.3 | 0.0367 | 3   | 5   | 4   | -0.9289 | -0.6778 | -0.8536 |

|       |         |       |       |        |      |     |     |         |         |         |
|-------|---------|-------|-------|--------|------|-----|-----|---------|---------|---------|
|       | TH-09   | 17    | 16.6  | 0.0089 | 3    | 5   | 4   | -1.2063 | -1.1699 | -1.1954 |
|       | TH-10   | 27    | 25.3  | 0.0187 | 4    | 5   | 4.7 | -0.3357 | -0.1548 | -0.2814 |
|       | TH-11   | 29    | 36.2  | 0.0481 | 5    | 5   | 5   | 0.5752  | 1.0880  | 0.7290  |
|       | TH-12   | 25    | 24.4  | 0.0383 | 5    | 4.5 | 5   | 0.3302  | 0.7474  | 0.4554  |
|       | Average | 24.1  | 28.5  | 0.0356 | 4.5  | 4.6 | 4.8 |         |         |         |
| YS    | YS-01   | 23    | 40    | 0.0323 | 5    | 4.7 | 5   | 0.3634  | 0.7075  | 0.4666  |
|       | YS-02   | 16    | 37.7  | 0.0203 | 5    | 5   | 4   | 0.0745  | 0.2998  | 0.1421  |
|       | YS-03   | 14    | 20    | 0.0074 | 3    | 5   | 4   | -0.9049 | -1.1969 | -0.9925 |
|       | YS-04   | 16    | 53.3  | 0.0532 | 4    | 4   | 4   | -0.5025 | -0.0851 | -0.3773 |
|       | YS-05   | 23    | 57.5  | 0.1230 | 5    | 5   | 4.7 | 0.9697  | 2.3282  | 1.3772  |
|       | Average | 18.4  | 41.7  | 0.0472 | 4.4  | 4.7 | 4.3 |         |         |         |
| YC    | YC-01   | 12    | 26.8  | 0.0126 | 4    | 4   | 4.5 | -0.6463 | -0.6575 | -0.6496 |
|       | YC-02   | 16    | 34    | 0.0234 | 5    | 4   | 5   | 0.4737  | 0.3166  | 0.4266  |
|       | YC-03   | 17    | 34.2  | 0.0297 | 4.5  | 5   | 5   | 0.7721  | 0.4460  | 0.6743  |
|       | YC-04   | 17    | 31    | 0.0115 | 4    | 4   | 4   | -0.8465 | -0.8247 | -0.8400 |
|       | YC-05   | 20    | 26    | 0.0188 | 5    | 4.5 | 5   | 0.4494  | 0.4017  | 0.4351  |
|       | YC-06   | 17    | 32    | 0.0153 | 5    | 5   | 5   | 0.4681  | 0.5061  | 0.4795  |
|       | YC-07   | 19    | 36    | 0.0292 | 3    | 4   | 4   | -0.6817 | -1.1441 | -0.8204 |
|       | Average | 16.9  | 31.4  | 0.0201 | 4.4  | 4.4 | 4.6 |         |         |         |
| MG    | MG-01   | 15    | 22    | 0.0122 | 4    | 4.5 | 4   | -0.4765 | -0.6448 | -0.5270 |
|       | MG-02   | 13    | 20    | 0.0120 | 4    | 4.5 | 5   | -0.1929 | -0.3520 | -0.2406 |
|       | MG-03   | 14    | 26.8  | 0.0221 | 5    | 4   | 5   | 0.5021  | 0.2931  | 0.4394  |
|       | MG-04   | 15    | 29.8  | 0.0268 | 5    | 5   | 5   | 1.0715  | 0.7108  | 0.9633  |
|       | MG-05   | 12    | 21.5  | 0.0096 | 4    | 4.5 | 4   | -0.5721 | -0.6918 | -0.6080 |
|       | MG-06   | 15    | 28.3  | 0.0284 | 3    | 4   | 5   | -0.3323 | -0.8624 | -0.4913 |
|       | Average | 14    | 24.7  | 0.0185 | 4.2  | 4.4 | 4.7 |         |         |         |
| MS    | MS-01   | 11    | 31.5  | 0.0185 | 4    | 5   | 5   | 0.5265  | -0.0703 | 0.3475  |
|       | MS-02   | 12    | 17.8  | 0.0067 | 3    | 4   | 5   | -0.7985 | -1.2481 | -0.9334 |
|       | MS-03   | 16    | 25    | 0.0181 | 5    | 5   | 4   | 0.6314  | 0.2604  | 0.5201  |
|       | MS-04   | 13    | 24.2  | 0.0083 | 3    | 5   | 4   | -0.7101 | -1.1820 | -0.8517 |
|       | MS-05   | 15    | 28.4  | 0.0132 | 5    | 4   | 5   | 0.3628  | 0.1362  | 0.2948  |
|       | Average | 13.4  | 25.4  | 0.0129 | 4    | 4.6 | 4.6 |         |         |         |
| Total | Average | 16.64 | 28.45 | 0.0204 | 4.47 | 4.6 | 4.6 |         |         |         |
